# Supplementary material for: Efficacy and Safety of IncobotulinumtoxinA in the Treatment of Lower Limb Spasticity in Japanese Subjects
Source: Front Neurol. 2022 Mar 17;13:832937. doi: 10.3389/fneur.2022.832937 (PMC8970182; doi:10.3389/fneur.2022.832937)
Supplement: Supplementary file 2 [file Data_Sheet_2.xlsx]

## Sheet: Table 1
Site Name (EN)	Site IRB Name (EN)	Central/Local
Tokai University Hospital	Tokai University Hospital group IRB	Central
Tokushima University Hospital	Tokushima University Hospital IRB	Local
Showa University Fujigaoka Rehabilitation Hospital	Showa University Fujigaoka Hospital IRB	Central
The Jikei University Hospital	Jikei University Hospital study drug IRB	Central
Tohoku University Hospital	Tohoku University Hospital IRB	Local
Fujita Health University Hospital →Fujita Health University Hospital	Fujita Health University Hospital IRB	Local
Saga University Hospital	Saga University Hospital IRB	Local
Gunma University Hospital	Gunma University Hospital IRB	Central
Kumamoto Kinoh Hospital	Kumamoto Kinoh Hospital IRB	Local
Hokkaido University Hospital	Hokkaido University Hospital IRB	Local
Asahikawa Medical University Hospital	Asahikawa Medical University Hospital IRB	Local
Kansai Medical University Hospital	Kansai Medical University Hospital IRB	Local
Tokeidai Memorial Hospital	Tokeidai Memorial Hospital IRB	Local
Kindai University Sakai Hospital	Kindai University Hospital IRB	Central
Nishi Hiroshima Rehabilitation Hospital	Sugiura Clinic IRB →Koukeikai Sugiura Clinic IRB	Central
Tokai University Hachioji Hospital	Tokai University Hospital group IRB	Central
Hamamatsu University Hospital	Hamamatsu University Hospital IRB	Local
Hospital of the University of Occupational and Environmental Health	Hospital of the University of Occupational and Environmental Health IRB	Local
University Hospital, Kyoto Prefectural University of Medicine	University Hospital, Kyoto Prefectural University of Medicine IRB	Central
Yokohama City University Medical Center	Yokohama City University Medical Center IRB	Local
IUWH Atami Hospital	IWH Group IRB	Central
Sanyudo Rehabilitation Center	Sugiura Clinic IRB →Koukeikai Sugiura Clinic IRB	Central
Saka General Hospital	Saka General Hospital IRB	Local
Kawasaki Medical School Hospital	Kawasaki Medical School Hospital IRB	Local
Tokyo Bay Rehabilitation Hospital	Sugiura Clinic IRB →Koukeikai Sugiura Clinic IRB	Central
Ookatsu Hospital	CPC Clinical Trial Hospital IRB →CPC Clinic IRB →Kawahara Urological Clinic IRB	Central
Tokai University Oiso Hospital	Tokai University Hospital group IRB	Central
Ijinkai Takeda General Hospital	Takeda Hospital Group IRB	Central
Goshominami Rehabilitation Clinic	Sugiura Clinic IRB →Koukeikai Sugiura Clinic IRB	Central
Hyogo College of Medicine College Hospital	Hyogo College of Medicine College Hospital IRB	Local
The Jikei University Kashiwa Hospital	Jikei University Hospital study drug IRB	Central
Nishinomiya Kyoritsu Rehabilitation Hospital	Sugiura Clinic IRB →Koukeikai Sugiura Clinic IRB	Central
Koyama Rehabilitation Hospital	Sugiura Clinic IRB →Koukeikai Sugiura Clinic IRB	Central
Kansai Medical University Medical Center	Kansai Medical University Medical Center IRB	Local
Jujo Takeda Rehabilitation Hospital	Takeda Hospital Group IRB	Central
The Jikei University Daisan Hospital	Jikei University Hospital study drug IRB	Central
Kyorin University Hospital	Kyorin University Hospital IRB	Central
Shiga Medical Center for Adults →Shiga General Hospital	Shiga Medical Center for Adults IRB →Shiga General Hospital IRB	Local
Fuchinobe General Hospital	CPC Clinical Trial Hospital IRB →CPC Clinic IRB →Kawahara Urological Clinic IRB	Central
National Hospital Organization Higashinagoya National	National Hospital Organization Higashinagoya National Hospital IRB	Local
Fujita Health University Banbuntane Houtokukai Hospital →Fujita Health University Bantane Hospital	Fujita Health University Banbuntane Houtokukai Hospital IRB →Fujita Health University Bantane Hospital IRB	Local
Site Name (EN)	Site IRB Name (EN)	Central/Local
Keio University Hospital	Keio University Hospital IRB	Local
Atago Hospital	Clinical Research Promotion Network Japan IRB	Central
Sasayama Medical Center Hyogo College of Medicine	Clinical Research Promotion Network Japan IRB	Central
Tokyo Teishin Hospital	Tokyo Teishin Hospital IRB	Local
Kumamoto Takumadai Rehabilitation Hospital	IRB of Kouseikai Sone Clinic	Central
Chiba Rehabilitation Center	IRB of Kouseikai Sone Clinic	Central
Shimane University Hospital	Shimane University Hospital IRB	Local
Chikamori Rehabilitation Hospital	Clinical Research Promotion Network Japan IRB	Central
National Hospital Organization Tokyo Medical Center	National Hospital Organization Tokyo Medical Center IRB	Local
Juntendo University Hospital	Juntendo University Hospital IRB	Local
Fujita General Hospital	Fujita General Hospital IRB	Local
Rakusai Shimizu Hospital	IRB of Kouseikai Sone Clinic	Central
